# Supplementary material for: Performances of survival, feeding behavior, and gene expression in aphids reveal their different fitness to host alteration
Source: PubMed Central journal article supplement (PMC4725932; doi:10.1038/srep19344), 2016-01-13
Supplement: srep19344-s1.pdf [file srep19344-s1.pdf]

1 Performances of survival, feeding behavior, and gene expression  
2 in aphids reveal their different fitness to host alteration

3

4 Hong Lu<sup>a, b #</sup>, Pengcheng Yang<sup>c #</sup>, Yongyu Xu<sup>b #</sup>, Lan Luo<sup>a</sup>, Junjie Zhu<sup>a</sup>,

5 Na Cui<sup>a</sup>, Le Kang<sup>\* a</sup>, Feng Cui<sup>\* a</sup>

6

7 <sup>a</sup> State Key Laboratory of Integrated Management of Pest Insects & Rodents, Institute  
8 of Zoology, Chinese Academy of Sciences, Beijing, China.

9 <sup>b</sup> Plant Protection College, Shandong Agricultural University, Tai'an, Shandong,  
10 China.

11 <sup>c</sup> Beijing Institutes of Life Science, Chinese Academy of Sciences, Beijing, China.

12 <sup>#</sup> These authors contribute equally to this work.

13 <sup>\*</sup> Corresponding author: Feng Cui, State Key Laboratory of Integrated Management of  
14 Pest Insects & Rodents, Institute of Zoology, Chinese Academy of Sciences, Beijing,  
15 100101 China. Tel: 86-10-64807218. Email: [cuif@ioz.ac.cn](mailto:cuif@ioz.ac.cn). Le Kang, State Key  
16 Laboratory of Integrated Management of Pest Insects & Rodents, Institute of Zoology,  
17 Chinese Academy of Sciences, Beijing, 100101 China. Tel: 86-10-64807219. Email:  
18 [lkang@ioz.ac.cn](mailto:lkang@ioz.ac.cn).

19

20

21 **Supporting Information**

22 Data S1. List of salivary gland-expressed genes of the pea aphid.

23 Data S2. The enriched GO molecular functions (Level 3) for all salivary

1 gland-expressed genes and the genes putatively encoding secretory proteins of  
2 pea aphids.

3 Data S3. List of differently expressed genes in the YYC clone after feeding on *Vicia*  
4 *villosa*, *Medicago truncatula*, or *Medicago sativa* for 5 h. The genes that varied  
5 in aphids for specific host plant are in bold.

6 Data S4. Commonly upregulated and downregulated genes when the YYC clone was  
7 short-term shifted to *Vicia villosa*, *Medicago truncatula*, or *Medicago sativa*, and  
8 after long-term acclimated on *V. villosa* or *M. truncatula*.

9 Data S5. List of differently expressed genes in the *Medicago truncatula* and *Vicia*  
10 *villosa* colony compared with the YYC clone. The genes that varied in a specific  
11 colony are in bold.

12
