# Supplementary material for: Performances of survival, feeding behavior, and gene expression in aphids reveal their different fitness to host alteration
Source: PubMed Central journal article supplement (PMC4725932; doi:10.1038/srep19344), 2016-01-13
Supplement: srep19344-s3.pdf [file srep19344-s3.pdf]

Performances of survival, feeding behavior, and gene expression in aphids reveal their  
different fitness to host alteration

Hong Lu, Pengcheng Yang, Yongyu Xu, Lan Luo, Junjie Zhu, Na Cui, Le Kang, Feng Cui

Data S4. Commonly upregulated and downregulated genes when the YYC clone was short-term shifted to *Vicia villosa*, *Medicago truncatula*, or *Medicago sativa*, and after long-term acclimated on *V. villosa* or *M. truncatula*.

| <b>Annotation</b>                                       | <b>Gene ID</b>                                                                                                                                                                                                                                                                                                                                                                                                                                                                                                                                                |
|---------------------------------------------------------|---------------------------------------------------------------------------------------------------------------------------------------------------------------------------------------------------------------------------------------------------------------------------------------------------------------------------------------------------------------------------------------------------------------------------------------------------------------------------------------------------------------------------------------------------------------|
| <b>short-term shift</b>                                 |                                                                                                                                                                                                                                                                                                                                                                                                                                                                                                                                                               |
| <b>co-downregulated</b>                                 |                                                                                                                                                                                                                                                                                                                                                                                                                                                                                                                                                               |
| heat shock proteins                                     | ACYPI002010, ACYPI21638, ACYPI21636, ACYPI004698, ACYPI009117                                                                                                                                                                                                                                                                                                                                                                                                                                                                                                 |
| 52 KDa repressor of the inhibitor of the protein kinase | ACYPI34603                                                                                                                                                                                                                                                                                                                                                                                                                                                                                                                                                    |
| unknown proteins                                        | ACYPI22179, ACYPI51701                                                                                                                                                                                                                                                                                                                                                                                                                                                                                                                                        |
| <b>long-term acclimation</b>                            |                                                                                                                                                                                                                                                                                                                                                                                                                                                                                                                                                               |
| <b>co-upregulated</b>                                   |                                                                                                                                                                                                                                                                                                                                                                                                                                                                                                                                                               |
| alpha-(1,6)-fucosyltransferase                          | ACYPI24917                                                                                                                                                                                                                                                                                                                                                                                                                                                                                                                                                    |
| acyl-CoA-binding protein                                | ACYPI001471                                                                                                                                                                                                                                                                                                                                                                                                                                                                                                                                                   |
| calpain-7                                               | ACYPI008750                                                                                                                                                                                                                                                                                                                                                                                                                                                                                                                                                   |
| transcription elongation factor 1                       | ACYPI27126                                                                                                                                                                                                                                                                                                                                                                                                                                                                                                                                                    |
| syntaxin-18                                             | ACYPI30696                                                                                                                                                                                                                                                                                                                                                                                                                                                                                                                                                    |
| unknown proteins                                        | ACYPI005818, ACYPI27259, ACYPI56347, ACYPI003041, ACYPI23163, ACYPI21823, ACYPI41715, ACYPI30075, ACYPI30076, ACYPI30077, ACYPI45829, ACYPI52855, ACYPI54675, ACYPI22815, ACYPI41716, ACYPI22179, ACYPI51492, ACYPI45828, ACYPI52854, ACYPI52524, ACYPI45615, ACYPI45830, ACYPI40266, ACYPI23443, ACYPI20968, ACYPI46969, ACYPI43357, ACYPI20392, ACYPI35626, ACYPI21765, ACYPI42501, ACYPI38875, ACYPI39384, ACYPI26742, ACYPI002861, ACYPI45859, ACYPI47628, ACYPI36246, ACYPI23754, ACYPI31429, ACYPI40702, ACYPI38521, ACYPI26814, ACYPI35193, ACYPI21720 |
| <b>co-downregulated</b>                                 |                                                                                                                                                                                                                                                                                                                                                                                                                                                                                                                                                               |
| takeout protein                                         | ACYPI001035, ACYPI25522, ACYPI24182                                                                                                                                                                                                                                                                                                                                                                                                                                                                                                                           |
| RNA-binding protein 14                                  | ACYPI005750                                                                                                                                                                                                                                                                                                                                                                                                                                                                                                                                                   |
| adhesive plaque matrix protein                          | ACYPI007563                                                                                                                                                                                                                                                                                                                                                                                                                                                                                                                                                   |
| suppressor protein SRP40                                | ACYPI001839                                                                                                                                                                                                                                                                                                                                                                                                                                                                                                                                                   |

---

|                                                         |                                                                                                                                   |
|---------------------------------------------------------|-----------------------------------------------------------------------------------------------------------------------------------|
| apolipophorin-3                                         | ACYPI36683                                                                                                                        |
| miple protein                                           | ACYPI37161                                                                                                                        |
| titin -like                                             | ACYPI36932, ACYPI008945                                                                                                           |
| bolA-like protein 2                                     | ACYPI001854                                                                                                                       |
| probable basic-leucine zipper<br>transcription factor Q | ACYPI009169                                                                                                                       |
| unknown proteins                                        | ACYPI005108, ACYPI010002, ACYPI007459, ACYPI005249,<br>ACYPI44068, ACYPI44495, ACYPI27628, ACYPI54512,<br>ACYPI000149, ACYPI51701 |

---
